# Supplementary material for: Silica nanoparticle-generated ROS as a predictor of cellular toxicity: mechanistic insights and safety by design
Source: Royal Society of Chemistry journal article supplement (doi:10.1039/c5en00179j), 2015-11-10
Supplement: c5en00179j1.pdf [file c5en00179j1.pdf]

## SUPPORTING INFORMATION TO:

### Silica Nanoparticle-Generated ROS as a Predictor of Cellular Toxicity: Mechanistic Insights and Safety by Design

Sean E. Lehman<sup>1</sup>, Angie S. Morris<sup>1,2</sup>, Paul S. Mueller<sup>1</sup>, Aliasger K. Salem<sup>2</sup>, Vicki H. Grassian<sup>1</sup>  
Sarah C. Larsen<sup>1\*</sup>

<sup>1</sup>Department of Chemistry, University of Iowa, Iowa City, IA 52242

<sup>2</sup>Division of Pharmaceutics and Translational Therapeutics, College of Pharmacy, University of Iowa, Iowa City, IA 52242

#### Cell Viability Data for 4 and 24 Hours in RAW 264.7 Macrophage Cell Line

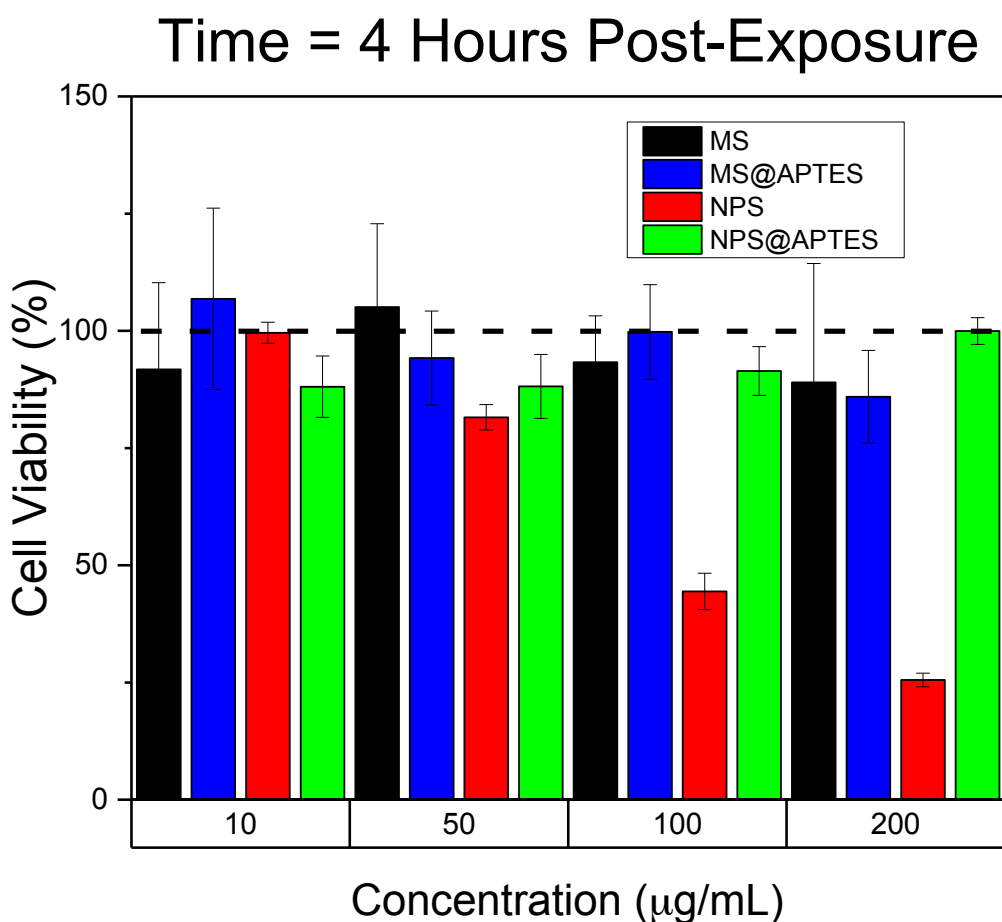

**Figure S1.** Cell viability data in RAW 264.7 macrophage cell line at 4 hours post-exposure.

## Time = 24 Hours Post-Exposure

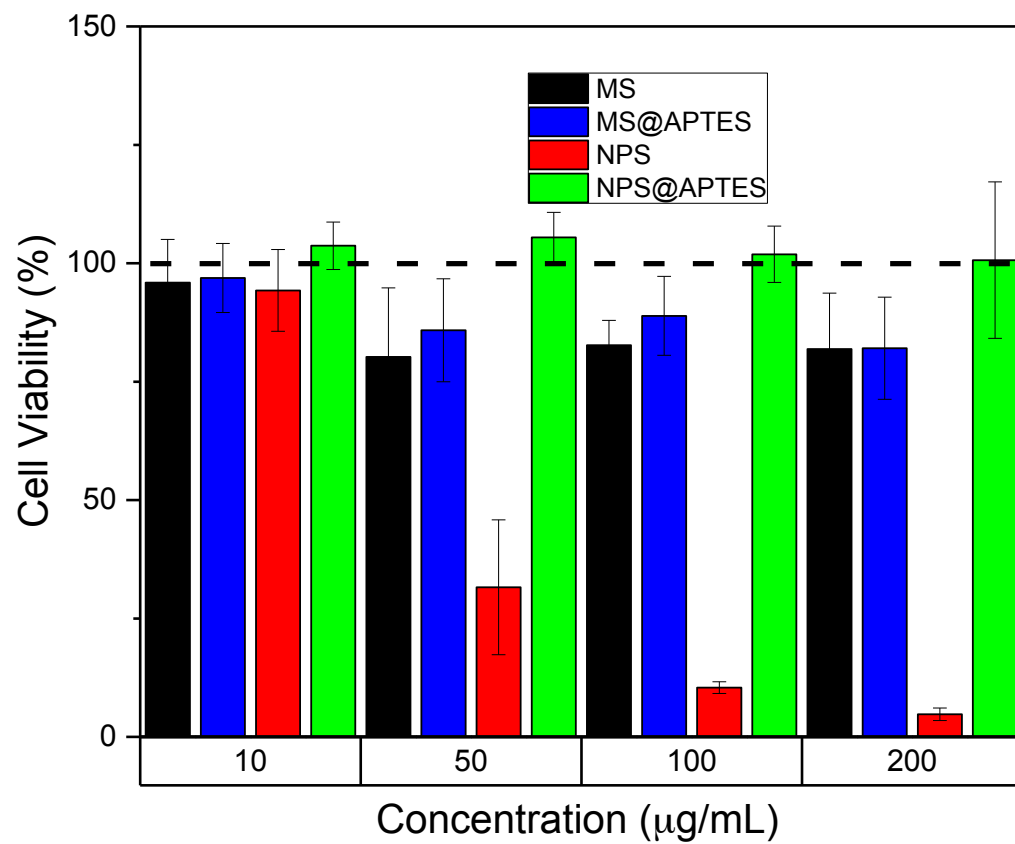

**Figure S2.** Cell viability in RAW 264.7 macrophage cell line at 24 hours post-exposure.

### Cell Viability Time-Dependence of NPS Material

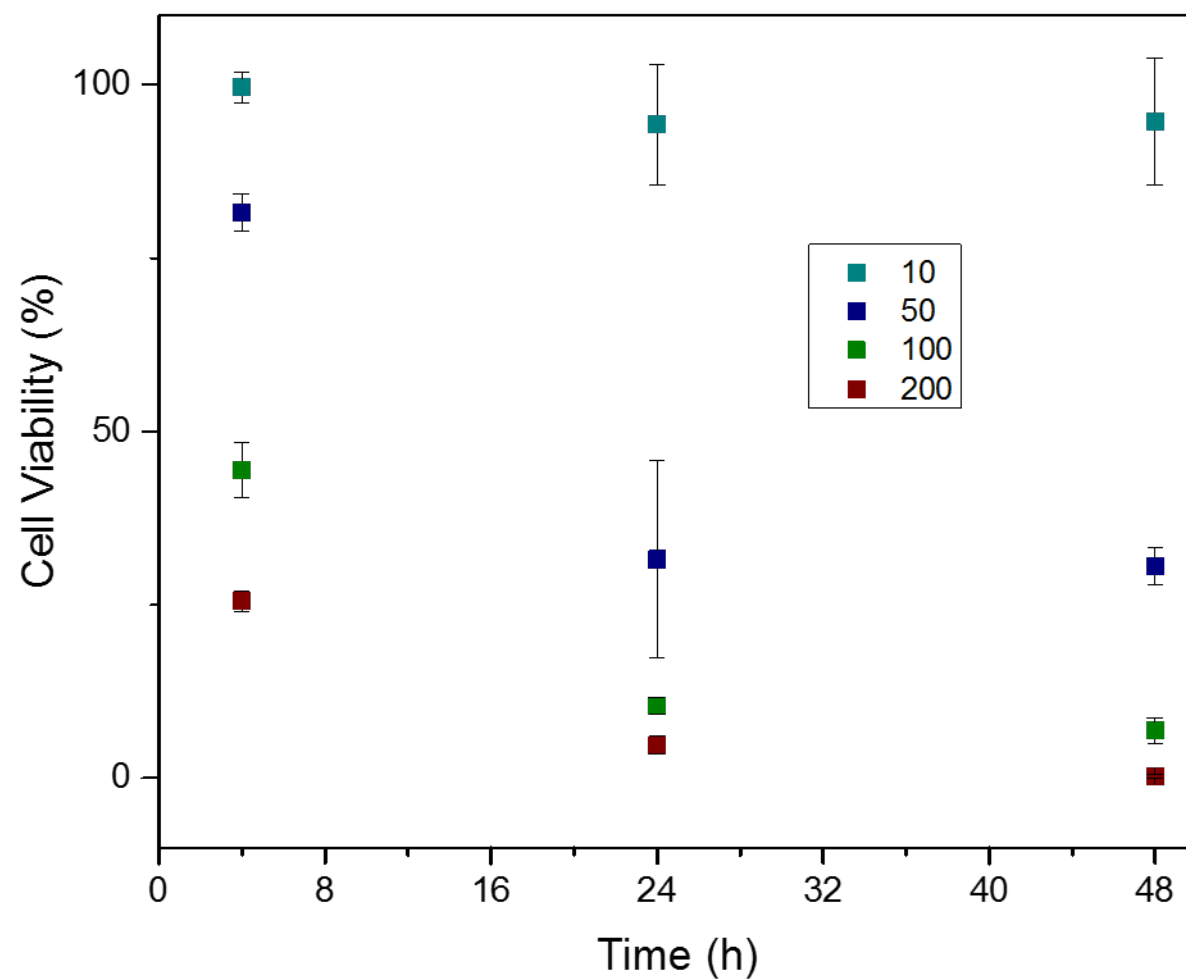

**Figure S3.** Time-dependent cell viability data in RAW 264.7 macrophage cell line for NPS material as a function of time and concentration (in µg/mL).

### Cell Viability Data for Min-U-Sil

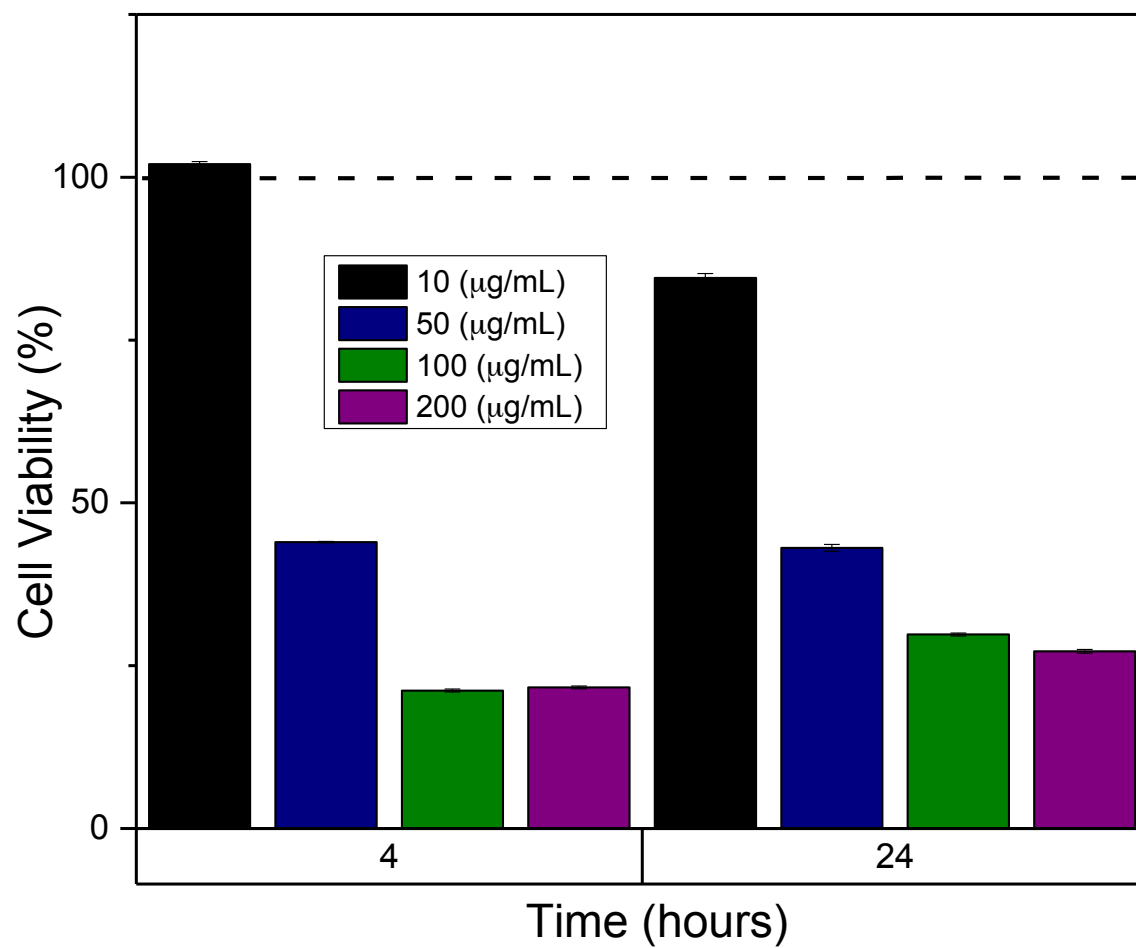

**Figure S4.** Cell viability data for Min-U-Sil in RAW 264.7 macrophage cell line as a function of time and concentration (µg/mL).

### EPR Data Tabulated Values

| Sample    | Radical Type | Radical Concentration<br>[Absolute] (nM) | Radical Production<br>(pmol/m <sup>2</sup> ) |
|-----------|--------------|------------------------------------------|----------------------------------------------|
| MS        | OH*          | 105.52                                   | 1.91                                         |
| MS@APTES  | OH*          | 203.1                                    | 5.81                                         |
| MS@APTES  | NO*          | 104.2                                    | 2.98                                         |
| NPS       | OH*          | 729.8                                    | 221.2                                        |
| NPS@APTES | OH*          | 284.3                                    | 135.4                                        |
| NPS@APTES | NO*          | 69.4                                     | 33.0                                         |
| Min-U-Sil | OH*          | 72.4                                     | 188.7                                        |

**Table ST1.** Tabulated data for the EPR spectra, which are displayed graphically in the main text.

### EPR Spectrum of Min-U-Sil in Water

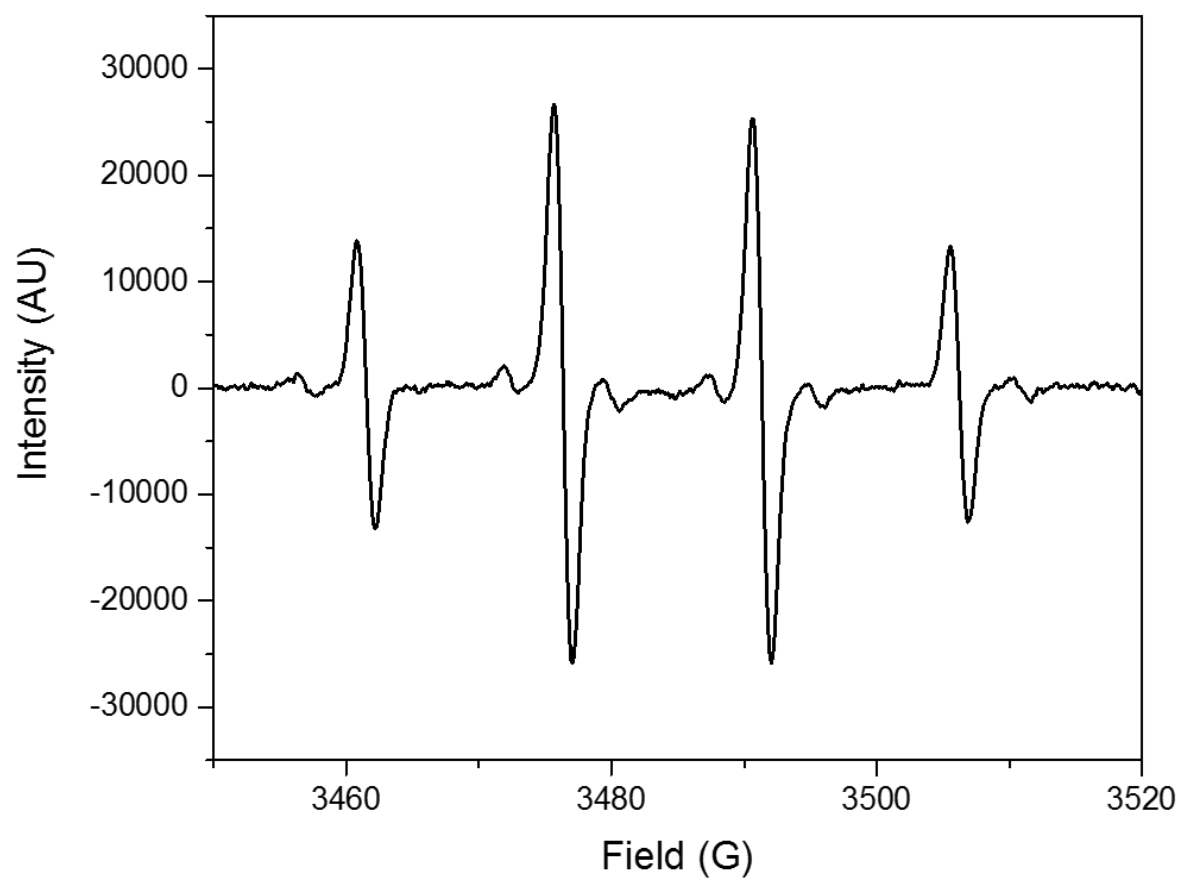

**Figure S5.** EPR spectrum of Min-U-Sil in water with added peroxide.

### Simulated Aminoxy Radical Comparison to Experimental Data

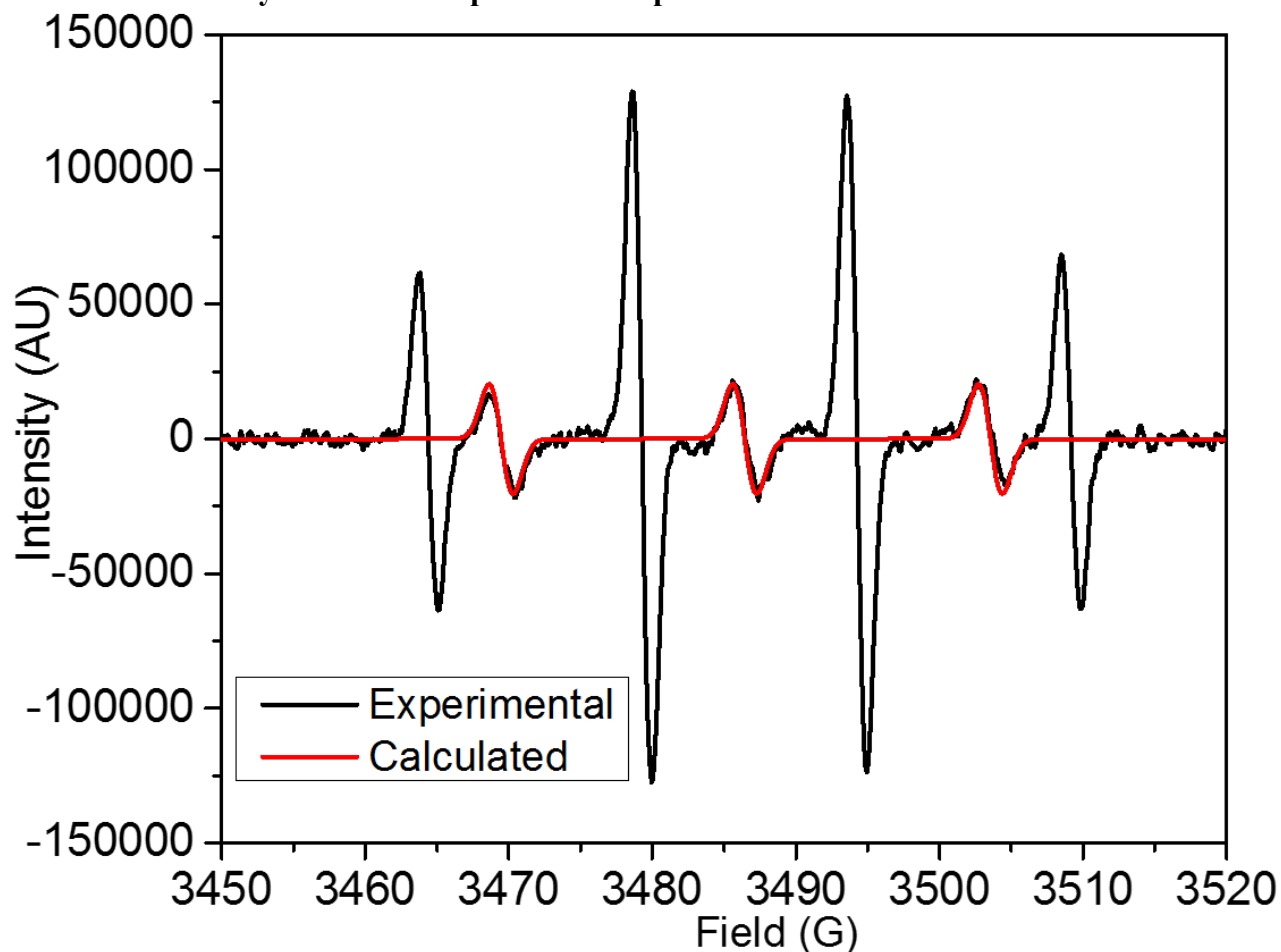

**FigureS6.** Comparison of experimental MS@APTES EPR spectrum with a calculated EPR spectrum for the proposed aminoxy radical calculated using EasySpin (garlic). The spectral intensity of the calculated spectrum has been matched to that of the experimental spectrum.

***In Vivo* Radical Concentration Calculation**

$$\frac{15,000 \text{ particles}}{\text{cell}} * \frac{\text{g}}{1.90 \times 10^{16} \text{ particles}} * \frac{1102 \text{ m}^2}{\text{g}} = \frac{1.66 \times 10^{-21} \text{ m}^2}{\text{cell}}$$

$$[\text{OH}^*] = \frac{1.91 \text{ pmol}}{\text{m}^2} * \frac{1.66 \times 10^{-21} \text{ m}^2}{\text{cell}} * \frac{\text{cell}}{2 \times 10^{-12} \text{ L}} = 8.31 \times 10^{-10} \text{ (M)} = 0.83 \text{ (nM)}$$

$$\frac{\text{Experimental } [\text{H}_2\text{O}_2]}{\text{In Vivo } [\text{H}_2\text{O}_2]} = \frac{0.200 \text{ M}}{1.0 \times 10^{-7} \text{ M}} = 2 \times 10^6$$

$$\text{Corrected } [\text{OH}^*] = \frac{8.31 \times 10^{-10} \text{ (M)}}{2 \times 10^6} = 4.2 \times 10^{-16} \text{ (M)}$$
